# Supplementary material for: Interest–Ability Profiles: An Integrative Approach to Knowledge Acquisition
Source: MDPI journal article supplement (doi:10.3390/jintelligence10030043), 2022-07-16

## SUPPLEMENTAL MATERIALS

**Table S1.**  
*Interest Scales from Project Talent Interest Inventory*

| Realistic                  | Investigative         | Artistic          | Social                    | Enterprising                 | Conventional                |
|----------------------------|-----------------------|-------------------|---------------------------|------------------------------|-----------------------------|
| Toolmaker                  | Surgeon               | Musician          | Social worker             | Personnel administrator      | Bookkeeper                  |
| Automobile Mechanic        | Chemist               | Reporter          | Elementary school teacher | Credit manager               | Bank teller                 |
| Electrician                | Astronomer            | Sculptor          | Guidance counselor        | President of a large company | Office clerk                |
| Electronics technician     | Research Scientist    | Author of a novel | College professor         | Real estate agent            | Certified Public Accountant |
| Bricklayer                 | Doctor                | Interpreter       | High school teacher       | Office manager               | Typist                      |
| House Painter              | Biologist             | Writer            | Religious worker          | Banker                       | Accountant or auditor       |
| Machinist                  | Laboratory technician | Musical composer  | School principal          | Salesman                     | Type setter                 |
| Carpenter                  | Physics               | Poet              | Sociology                 | Manage a large store         | Make out income tax returns |
| Operate a crane or derrick | Studying              | Artist            | Teach children            | Sell merchandise to stores   | Keep accounts               |

**Table S2**  
*Correlations among Study's Variables*

| No. | Variable               | Mean  | SD    | 1    | 2    | 3    | 4    | 5    | 6    | 7    | 8    | 9   | 10   | 11   | 12  | 13  |
|-----|------------------------|-------|-------|------|------|------|------|------|------|------|------|-----|------|------|-----|-----|
| 1   | Sex                    | 1.5   | .5    |      |      |      |      |      |      |      |      |     |      |      |     |     |
| 2   | SES                    | 97.94 | 10.14 | -.01 |      |      |      |      |      |      |      |     |      |      |     |     |
| 3   | Verbal ability         | 0     | 1     | .08  | .43  |      |      |      |      |      |      |     |      |      |     |     |
| 4   | Math ability           | 0     | 1     | -.18 | .40  | .70  |      |      |      |      |      |     |      |      |     |     |
| 5   | Spatial ability        | 0     | 1     | -.32 | .33  | .60  | .62  |      |      |      |      |     |      |      |     |     |
| 6   | Realistic interest     | 0     | 1     | -.64 | -.12 | -.16 | .03  | .21  |      |      |      |     |      |      |     |     |
| 7   | Investigative interest | 0     | 1     | -.29 | .17  | .24  | .37  | .31  | .29  |      |      |     |      |      |     |     |
| 8   | Artistic interest      | 0     | 1     | .29  | .08  | .16  | .06  | -.04 | -.04 | .27  |      |     |      |      |     |     |
| 9   | Enterprising interest  | 0     | 1     | -.18 | .07  | .09  | .13  | .06  | .28  | .30  | .30  |     |      |      |     |     |
| 10  | Social interest        | 0     | 1     | .43  | .07  | .15  | .07  | -.12 | -.19 | .11  | .44  | .30 |      |      |     |     |
| 11  | Conventional interest  | 0     | 1     | .36  | -.17 | -.11 | -.19 | -.22 | -.05 | -.10 | .15  | .34 | .32  |      |     |     |
| 12  | Literature test        | 12.12 | 4.64  | -.02 | .42  | .75  | .63  | .47  | -.10 | .26  | .18  | .10 | .11  | -.20 |     |     |
| 13  | Music test             | 6.12  | 2.98  | .10  | .44  | .67  | .54  | .40  | -.18 | .21  | .22  | .06 | .17  | -.12 | .66 |     |
| 14  | Social Studies test    | 14.06 | 5.42  | -.18 | .39  | .76  | .66  | .54  | .01  | .30  | .06  | .13 | .04  | -.21 | .73 | .61 |
| 15  | Math test              | 8.28  | 5.17  | -.19 | .40  | .67  | .95  | .59  | .03  | .37  | .07  | .12 | .06  | -.21 | .63 | .54 |
| 16  | Physical Science test  | 8.16  | 4.10  | -.30 | .33  | .62  | .69  | .61  | .12  | .41  | .01  | .07 | -.05 | -.27 | .58 | .49 |
| 17  | Biology test           | 5.80  | 2.41  | -.20 | .29  | .59  | .54  | .51  | .07  | .32  | .05  | .04 | -.02 | -.23 | .57 | .46 |
| 18  | Aeronautics test       | 3.65  | 2.30  | -.43 | .27  | .42  | .49  | .53  | .23  | .35  | -.07 | .07 | -.19 | -.30 | .45 | .36 |
| 19  | Electronics test       | 7.20  | 4.03  | -.47 | .24  | .40  | .53  | .56  | .30  | .35  | -.13 | .07 | -.20 | -.28 | .40 | .32 |
| 20  | Mechanical test        | 9.65  | 3.97  | -.56 | .22  | .40  | .46  | .59  | .39  | .29  | -.17 | .10 | -.25 | -.29 | .39 | .28 |
| 21  | Art test               | 6.09  | 2.60  | .04  | .39  | .69  | .50  | .44  | -.13 | .22  | .17  | .07 | .11  | -.16 | .66 | .61 |
| 22  | Law test               | 4.50  | 1.82  | -.16 | .30  | .60  | .52  | .46  | .04  | .24  | .06  | .12 | .02  | -.18 | .57 | .47 |
| 23  | Business test          | 4.47  | 1.98  | -.01 | .32  | .63  | .50  | .41  | -.06 | .17  | .08  | .14 | .09  | -.07 | .56 | .50 |
| 24  | Bible/Religion test    | 6.87  | 3.27  | .03  | .24  | .59  | .45  | .36  | -.10 | .21  | .17  | .04 | .14  | -.11 | .55 | .46 |
| 25  | Theater/Ballet test    | 4.13  | 1.81  | .15  | .37  | .67  | .47  | .35  | -.20 | .14  | .19  | .07 | .17  | -.09 | .62 | .60 |

*Note.* All correlations above .01 are significant at  $p < .01$ . Sex coded as Female = 1, Male = 2.

**Table S2 (continued).***Correlations among study's variables*

| No. | Variable               | Mean  | SD    | 14  | 15  | 16  | 17  | 18  | 19  | 20  | 21  | 22  | 23  | 24  | 25 |
|-----|------------------------|-------|-------|-----|-----|-----|-----|-----|-----|-----|-----|-----|-----|-----|----|
| 1   | Sex                    | 1.5   | .5    |     |     |     |     |     |     |     |     |     |     |     |    |
| 2   | SES                    | 97.94 | 10.14 |     |     |     |     |     |     |     |     |     |     |     |    |
| 3   | Verbal ability         | 0     | 1     |     |     |     |     |     |     |     |     |     |     |     |    |
| 4   | Math ability           | 0     | 1     |     |     |     |     |     |     |     |     |     |     |     |    |
| 5   | Spatial ability        | 0     | 1     |     |     |     |     |     |     |     |     |     |     |     |    |
| 6   | Realistic interest     | 0     | 1     |     |     |     |     |     |     |     |     |     |     |     |    |
| 7   | Investigative interest | 0     | 1     |     |     |     |     |     |     |     |     |     |     |     |    |
| 8   | Artistic interest      | 0     | 1     |     |     |     |     |     |     |     |     |     |     |     |    |
| 9   | Enterprising interest  | 0     | 1     |     |     |     |     |     |     |     |     |     |     |     |    |
| 10  | Social interest        | 0     | 1     |     |     |     |     |     |     |     |     |     |     |     |    |
| 11  | Conventional interest  | 0     | 1     |     |     |     |     |     |     |     |     |     |     |     |    |
| 12  | Literature test        | 12.12 | 4.64  |     |     |     |     |     |     |     |     |     |     |     |    |
| 13  | Music test             | 6.12  | 2.98  |     |     |     |     |     |     |     |     |     |     |     |    |
| 14  | Social Studies test    | 14.06 | 5.42  |     |     |     |     |     |     |     |     |     |     |     |    |
| 15  | Math test              | 8.28  | 5.17  | .65 |     |     |     |     |     |     |     |     |     |     |    |
| 16  | Physical Science test  | 8.16  | 4.10  | .67 | .69 |     |     |     |     |     |     |     |     |     |    |
| 17  | Biology test           | 5.80  | 2.41  | .61 | .54 | .62 |     |     |     |     |     |     |     |     |    |
| 18  | Aeronautics test       | 3.65  | 2.30  | .51 | .49 | .60 | .49 |     |     |     |     |     |     |     |    |
| 19  | Electronics test       | 7.20  | 4.03  | .49 | .53 | .66 | .49 | .63 |     |     |     |     |     |     |    |
| 20  | Mechanical test        | 9.65  | 3.97  | .50 | .46 | .56 | .51 | .59 | .66 |     |     |     |     |     |    |
| 21  | Art test               | 6.09  | 2.60  | .62 | .50 | .49 | .48 | .39 | .34 | .33 |     |     |     |     |    |
| 22  | Law test               | 4.50  | 1.82  | .60 | .51 | .51 | .47 | .45 | .43 | .45 | .51 |     |     |     |    |
| 23  | Business test          | 4.47  | 1.98  | .57 | .48 | .44 | .42 | .35 | .35 | .37 | .53 | .52 |     |     |    |
| 24  | Bible/Religion test    | 6.87  | 3.27  | .54 | .45 | .44 | .43 | .31 | .27 | .26 | .48 | .45 | .42 |     |    |
| 25  | Theater/Ballet test    | 4.13  | 1.81  | .55 | .47 | .41 | .40 | .31 | .25 | .24 | .63 | .53 | .53 | .44 |    |

*Note.* All correlations above .01 are significant at  $p < .01$ . Sex coded as Female = 1, Male = 2.

**Table S3***Factor loadings from Exploratory Factor Analysis*

| Variable                   | Factor 1   | Factor 2   | Factor 3    |
|----------------------------|------------|------------|-------------|
| Math ability               | <b>.76</b> | .19        | -.01        |
| Verbal ability             | <b>.89</b> | -.19       | .09         |
| Spatial ability            | <b>.56</b> | <b>.30</b> | -.17        |
| Realistic interest         | -.26       | <b>.74</b> | .03         |
| Investigative interest     | .23        | <b>.51</b> | .25         |
| Artistic interest          | .18        | .03        | <b>.59</b>  |
| Enterprising interest      | .02        | <b>.49</b> | <b>.63</b>  |
| Social interest            | .17        | -.09       | <b>.66</b>  |
| Conventional interest      | -.19       | .01        | <b>.48</b>  |
| Literature knowledge       | <b>.86</b> | -.07       | .03         |
| Music knowledge            | <b>.79</b> | -.15       | .08         |
| Social studies knowledge   | <b>.82</b> | .08        | .03         |
| Math knowledge             | <b>.74</b> | .20        | -.01        |
| Physical science knowledge | <b>.66</b> | <b>.31</b> | -.14        |
| Biology knowledge          | <b>.63</b> | .18        | -.11        |
| Aeronautics knowledge      | <b>.46</b> | <b>.38</b> | -.24        |
| Electronics knowledge      | <b>.41</b> | <b>.48</b> | -.27        |
| Mechanical knowledge       | <b>.38</b> | <b>.50</b> | <b>-.30</b> |
| Art knowledge              | <b>.79</b> | -.13       | .03         |
| Law Knowledge              | <b>.65</b> | .09        | -.04        |
| Business knowledge         | <b>.68</b> | -.02       | .04         |
| Bible knowledge            | <b>.65</b> | -.07       | .06         |
| Theater knowledge          | <b>.77</b> | -.22       | .09         |

*Note.* Loadings > 0.30 are in bold.

**Table S4***Average Latent Class Assignment Probabilities*

| <b>No.</b> | <b>Profile</b>                | <b>1</b> | <b>2</b> | <b>3</b> | <b>4</b> | <b>5</b> | <b>6</b> | <b>7</b> | <b>8</b> |
|------------|-------------------------------|----------|----------|----------|----------|----------|----------|----------|----------|
| 1          | Conventional/Low-Ability      | .849     | .025     | .067     | .000     | .000     | .032     | .027     | .000     |
| 2          | Ambivalent/Low-Ability        | .037     | .853     | .050     | .000     | .009     | .050     | .000     | .000     |
| 3          | Conventional/Average-Ability  | .051     | .027     | .815     | .000     | .018     | .011     | .045     | .033     |
| 4          | Intellectual/Mathematical     | .000     | .000     | .000     | .906     | .034     | .000     | .006     | .052     |
| 5          | Science                       | .000     | .006     | .027     | .025     | .820     | .051     | .035     | .034     |
| 6          | Realistic/Spatial             | .044     | .041     | .018     | .000     | .057     | .814     | .027     | .000     |
| 7          | Disinterested/Average-Ability | .035     | .000     | .070     | .006     | .040     | .027     | .779     | .043     |
| 8          | Cultural                      | .000     | .000     | .051     | .045     | .037     | .000     | .042     | .826     |

*Note.* Probabilities are expressed as proportions.

**Table S5**

*Project Talent ability test names, test type, number of items, and reliabilities for males/females*

| <b>Test Name</b>         | <b>Test Type</b>     | <b>Items</b> | <b>Reliability</b> |
|--------------------------|----------------------|--------------|--------------------|
| Vocabulary               | Verbal ability       | 21           | .71/.71            |
| Spelling                 | Verbal ability       | 16           | .60/.56            |
| Capitalization           | Verbal ability       | 33           | .85/.83            |
| Punctuation              | Verbal ability       | 27           | .72/.73            |
| English usage            | Verbal ability       | 25           | .56/.49            |
| Effective expression     | Verbal ability       | 12           | .63/.52            |
| Reading comprehension    | Verbal ability       | 48           | .86/.84            |
| Mathematics              | Quantitative ability | 23           | .77/.72            |
| Arithmetic reasoning     | Quantitative ability | 16           | .73/.71            |
| Introductory mathematics | Quantitative ability | 24           | .78/.73            |
| Advanced mathematics     | Quantitative ability | 14           | .52/.42            |
| Visualization in 2D      | Spatial ability      | 24           | .81/.80            |
| Visualization in 3D      | Spatial ability      | 16           | .70/.59            |
| Mechanical reasoning     | Spatial ability      | 20           | .76/.64            |
| Abstract reasoning       | Spatial ability      | 15           | .66/.65            |

*Note.* Reliabilities are taken from Flanagan et al. (Flanagan, 1964) and are based on the Kuder-Richards Formula 21 otherwise noted. These reliabilities were calculated by averaging the reliabilities across the 9<sup>th</sup> – 12<sup>th</sup> grade levels.

**Table S6**

*Project Talent knowledge test names, test type, number of items, and reliabilities for males/females*

| <b>Test Name</b> | <b>Knowledge Domain</b> | <b>Items</b> | <b>Reliability</b>   |
|------------------|-------------------------|--------------|----------------------|
| Business         | Civics                  | 10           | .51/.51 <sup>a</sup> |
| Law              | Civics                  | 9            | .51/.43 <sup>a</sup> |
| Social Studies   | Civics                  | 24           | .83/.79              |
| Art              | Humanities              | 12           | .64/.65 <sup>a</sup> |
| Bible            | Humanities              | 15           | .74/.73 <sup>a</sup> |
| Literature       | Humanities              | 24           | .72/.70              |
| Music            | Humanities              | 13           | .67/.67              |
| Theater          | Humanities              | 8            | .52/.59 <sup>a</sup> |
| Aeronautics      | Mechanical              | 10           | .63/.34              |
| Electronics      | Mechanical              | 20           | .76/.43              |
| Mechanical       | Mechanical              | 19           | .66/.48              |
| Biology          | Science                 | 11           | .57/.51              |
| Math             | Science                 | 23           | .81/.78              |
| Physics          | Science                 | 18           | .77/.72              |

*Note.* Reliabilities are taken from Flanagan et al. (1964) and are based on the Kuder-Richards Formula 21 unless otherwise noted. These reliabilities were calculated by averaging the reliabilities across the 9<sup>th</sup> – 12<sup>th</sup> grade levels.

<sup>a</sup> Estimate based on Kuder-Richards Formula 20

**Figure S1***Scree plot for Exploratory Factor Analysis*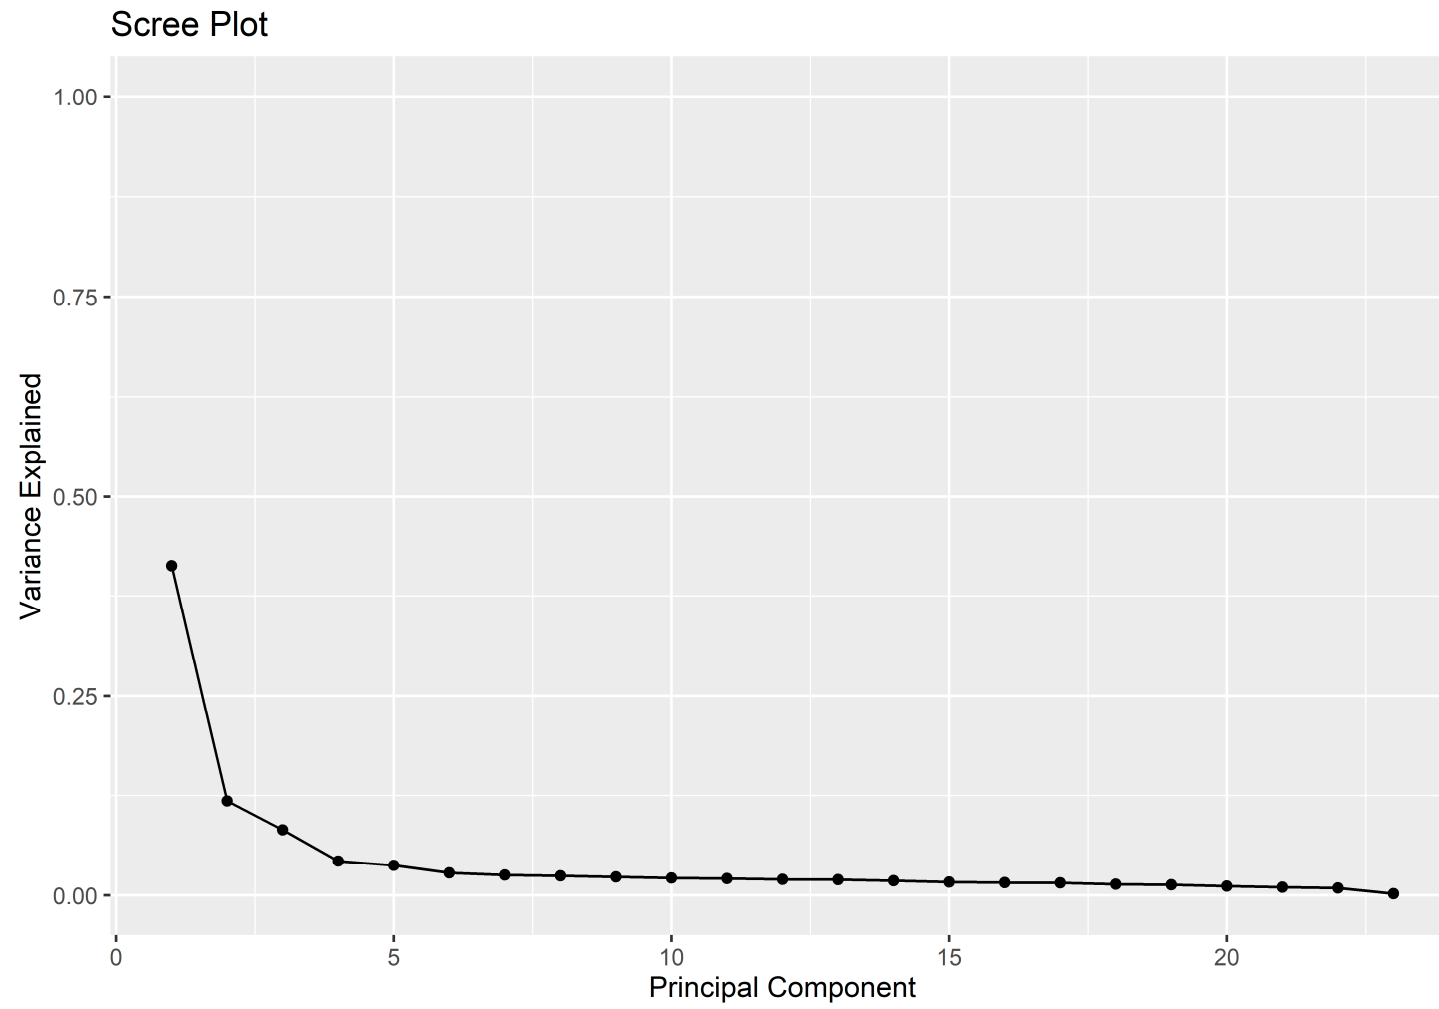



**Figure S2***Horn's Parallel Analysis for EFA*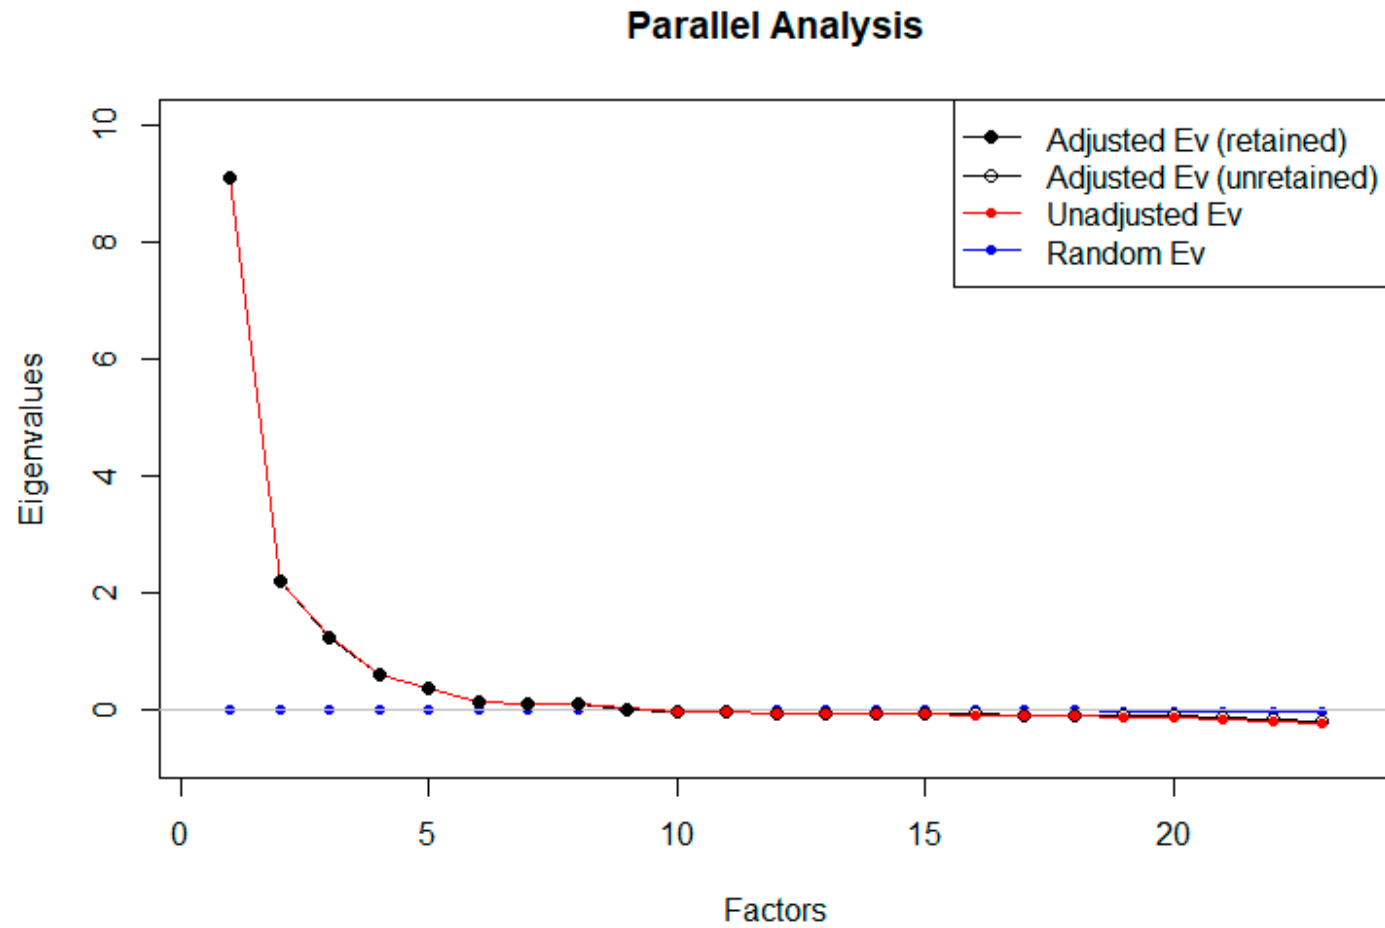

Supplement: s1 [file s1]
